# Supplementary material
Source: PubMed Central journal article supplement (PMC7206532)
Supplement: jamaoncol-6-895-s003.pdf [file jamaoncol-6-895-s003.pdf]

## Data Sharing Statement

Navari. Olanzapine for the Treatment of Advanced Cancer-Related Chronic Nausea and/or Vomiting. *JAMA Oncol*. Published May 07, 2020. 10.1001/jamaoncol.2020.1052

### Data

**Data available:** Yes

**Data types:** Deidentified participant data

**How to access data:** [cloprinzi@mayo.edu](mailto:cloprinzi@mayo.edu)

**When available:** With publication

### Supporting Documents

**Document types:** None

### Additional Information

**Who can access the data:** researchers whose proposed use of the data has been approved

**Types of analyses:** For a specified purpose.

**Mechanisms of data availability:** after approval of a proposal

**Any additional restrictions:** None
